# Supplementary material
Source: HighWire-hosted journal article supplement (https://cmaj.ca/highwire/filestream/148983/field_highwire_adjunct_files/3/230108-guide-4-at.pdf)
Supplement: 230108-guide-4-at.pdf [file 230108-guide-4-at.pdf]

## Appendix 4: Conflict of Interest Form

### Participant Terms and Conditions

**Meeting Title – Meeting Date**

As a participant, you agree as follows:

**Conflict of Interest:** You do not have a conflict of interest or have set out below any real, potential or perceived conflict of interest. Should you become aware of any previously undeclared conflict of interest, you will immediately declare it to other participants and/or report it to the Director, Donation and Transplantation, Canadian Blood Services (the "Director") or designate. You consent to disclosure of any conflict of interest you have so stated or declared to other participants.

- State Conflict of Interest (as applicable):  
\_\_\_\_\_

**Confidential Information:** You will treat any confidential information provided to you in such a way that it remains confidential and you will not release, publish, or distribute the confidential information in any way nor will you use it directly or indirectly without obtaining the written authorization of the Director or designate.

**Documentation obtained through workshop/forum participation:** You will take all reasonable efforts to secure the documentation and will not share or disclose it to any unauthorized person or organization. At the request of the Director or designate, you will return the documentation or any part thereof and will not keep any copies.

**Participation:** You will, to the best of your abilities, attend the meetings as scheduled and you will inform Canadian Blood Services should you be unable to attend or not be able to continue to serve as a participant of the forum/workshop. You will review or critique materials as requested and will be prepared to participate fully in discussion.

**Consent:** During the virtual meeting, participants may be visible/audible to other participants. If you do not wish to share your camera and/or audio, you may choose to turn them off. By leaving your camera and/or audio on, you understand that the virtual meeting may be recorded and give your permission to being recorded. You voluntarily and without compensation irrevocably grant to Canadian Blood Services the right to use your image, testimonial, name, audio or visual recording in the advertising, publicity or other business purposes of Canadian Blood Services in media, including but not limited to print, broadcast, electronic/online media, digital media and social media, throughout the world. You understand and agree that you have granted this right to Canadian Blood Services and its subsidiaries, collaborators, affiliates, licensees, successors, and assigns, and whomever it or they may further designate.

\_\_\_\_\_  
**Participant Signature**

\_\_\_\_\_  
**Participant Name**

\_\_\_\_\_  
**Date**
